# Supplementary material
Source: PubMed Central journal article supplement (PMC3734653)

## SUPPLEMENTARY MATERIAL

**Figure S1** Single letter amino acid sequence of Ag insert.

The signal sequence is underlined. The 10x histidine tag is italicized. The ovalbumin-derived SIINFEKL peptide is bold faced. The SIINFEKL epitope is embedded in a larger peptide to facilitate Ag processing.

```
MWWRLWLLLLLLLLLWPMVWAHHHHHHHHHLNEFCTSGLAV  
GATKVP RNQDWLGVSRQLDILRGLEQLESIINFEKLTEWTSSSS  
AESLKISQAVHAAHAEINEAGREVVGSAES
```

**Figure S2** Gating strategy for detecting Ag-specific CD8<sup>+</sup> T cells in mice challenged with LM-OVA.

Mice were immunized with equimolar amounts of MC-Ag, FL-Ag or VC DNA three times, three days apart (on d0, d3, d6). One day after each immunization, mice were injected subcutaneously with 10µg polyI:CLC. Peripheral blood and spleens were harvested on d11 from LM-OVA challenged mice that were immunized with the indicated DNA. The contour plots below were generated from lymphocytes, based on their forward and side scatter profiles. The gate indicates cells binding the anti-CD8-APC antibody and SIINFEKL-K<sup>b</sup>-PE tetramer.

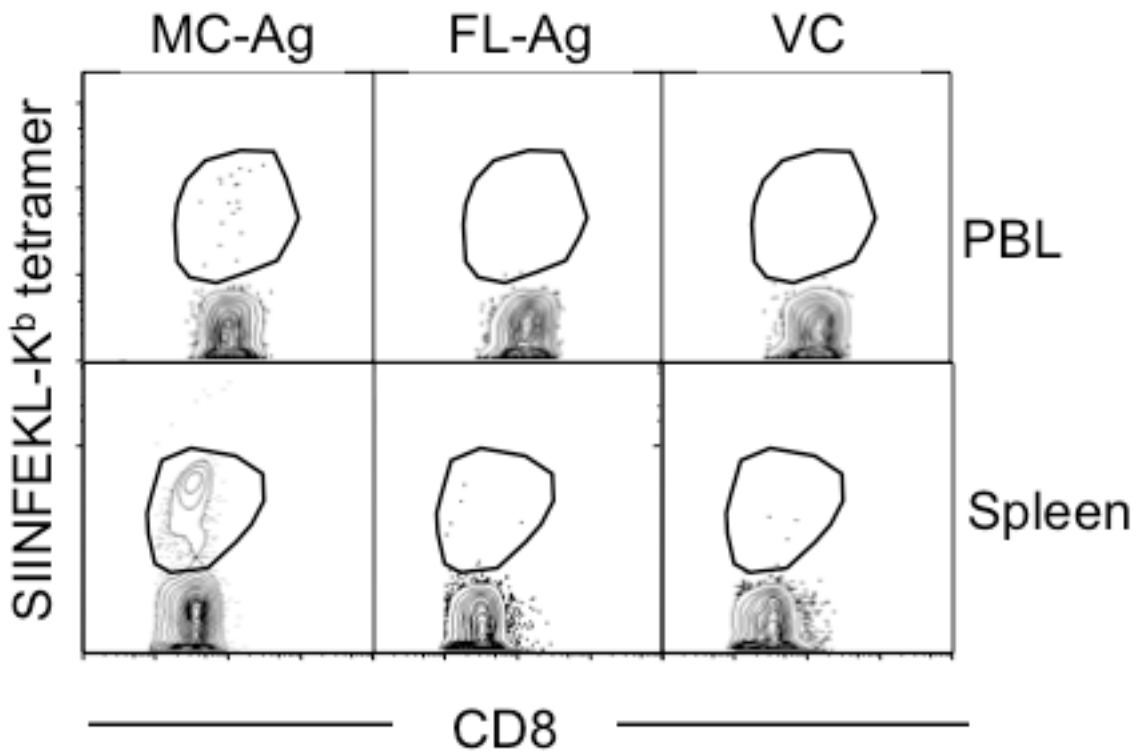

Supplement: mt201385x1.pdf [file mt201385x1.pdf]
